# Supplementary material
Source: publisher site journal article supplement (https://www.degruyter.com/publication/journal_key/SEMI/downloadAsset/SEMI_Policy_Authors_of_Semiotica.pdf)
Supplement: Supplementary file 1 [file SEMI_Policy_Authors_of_Semiotica.pdf]

## **Semiotica: Author Publication Policy \*New as of March 2022\***

As *Semiotica* continues to receive a high volume of submissions, in both French and English, and as we endeavour to support our goals of publishing the semiotic community broadly and inclusively, representing both theory and practice, and wanting to include a diverse authorship and their relative perspectives, the journal has implemented the following policies around multiple submissions in queue<sup>1</sup> by a single author.

### **1. New Submissions**

#### **1.1 One-in-queue Rule: Regular Issues**

*Semiotica* publishes 6 issues per year and accepts publications from authors in both French and English. **An author may have one article in queue at a time.** This means that only one article (in either French or English) may be in the production queue at a time. Authors who submit multiple articles will receive an email notification and will be asked to remove any article over the count of one. Should an author choose to continue working with the editorial team on an article that was submitted after their first, they must provide, in writing, a request to have the first (or any other) article withdrawn.

#### **1.2 Exceptions for Multi-Authored Submissions**

Co-Authored or Multi-Authored submissions will be considered on a case-by-case basis. We ask that the corresponding authors (with multiple articles in queue) write to the Editors ahead of submission.

#### **1.3 Exceptions for Special Issues**

*Semiotica* invites 1 to 2 special issues and/or sections per year. An author who is currently in the production queue for a regular issue article may choose to participate in a special issue as well. It is recommended that the author in question write to the Editors to confirm that they are participating in both a regular issue and a special issue, clarifying that these articles are in queue at the same time.

### **2. Previously Accepted Articles in Queue**

*Semiotica* honours previously accepted articles as well as those contributions in queue as of March 1, 2022. However, authors are advised that only one such article will be published per 6 issues. With this in mind, we appreciate that authors who wish to see their articles published sooner may withdraw their article at any time for submission elsewhere. Authors with questions regarding the status of publication and/or wanting to withdraw their article should write to the Editors, including the article's SEMI number.

It is asked that authors who currently have multiple articles in queue for publication refrain from submitting anew through to Scholar One. Should an author have an interest in submitting again, please write directly to the Editorial team so that your case may be assessed.

---

<sup>1</sup> An article in queue is defined as a submission, through Scholar One, having received a SEMI number, undergoing the peer review process, revisions, and decisions up to the point of rejection or publication
